# Supplementary material for: Phase II study of ceralasertib (AZD6738) in combination with durvalumab in patients with advanced gastric cancer
Source: HighWire-hosted journal article supplement (doi:10.1136/jitc-2022-005041), 2022-07-01

## Supplementary figure S1

A

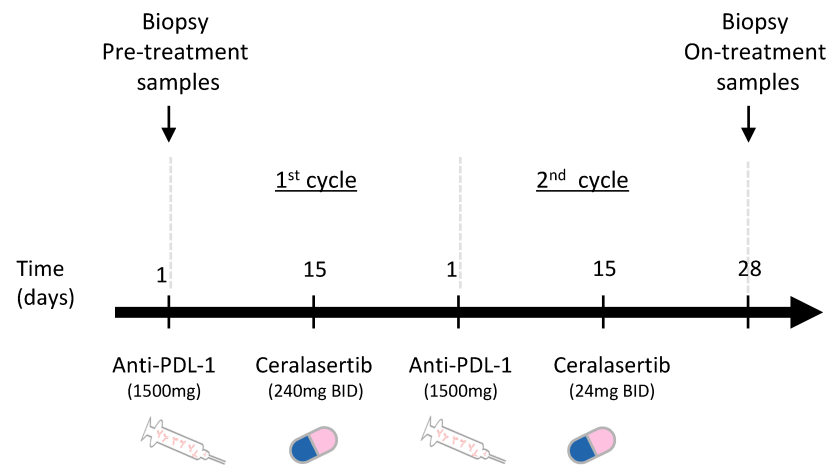

B

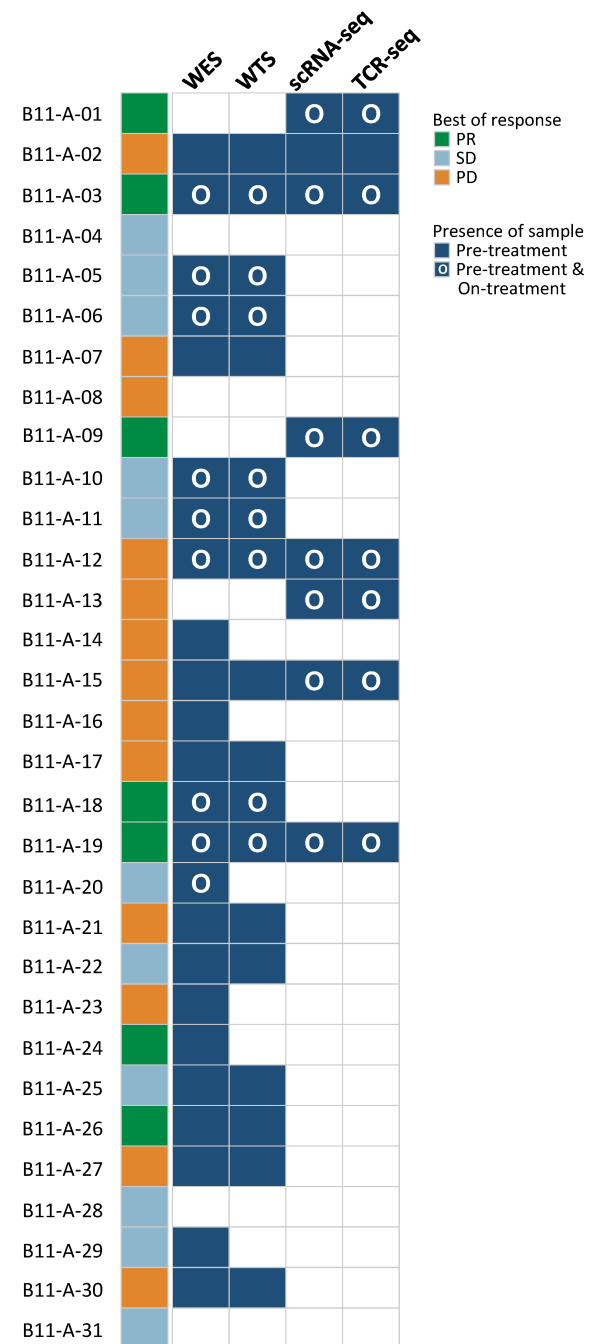

## Supplementary figure S2

**A**#24 (Partial response), ATM<sup>Loss</sup>, signature HRD<sup>Hi</sup>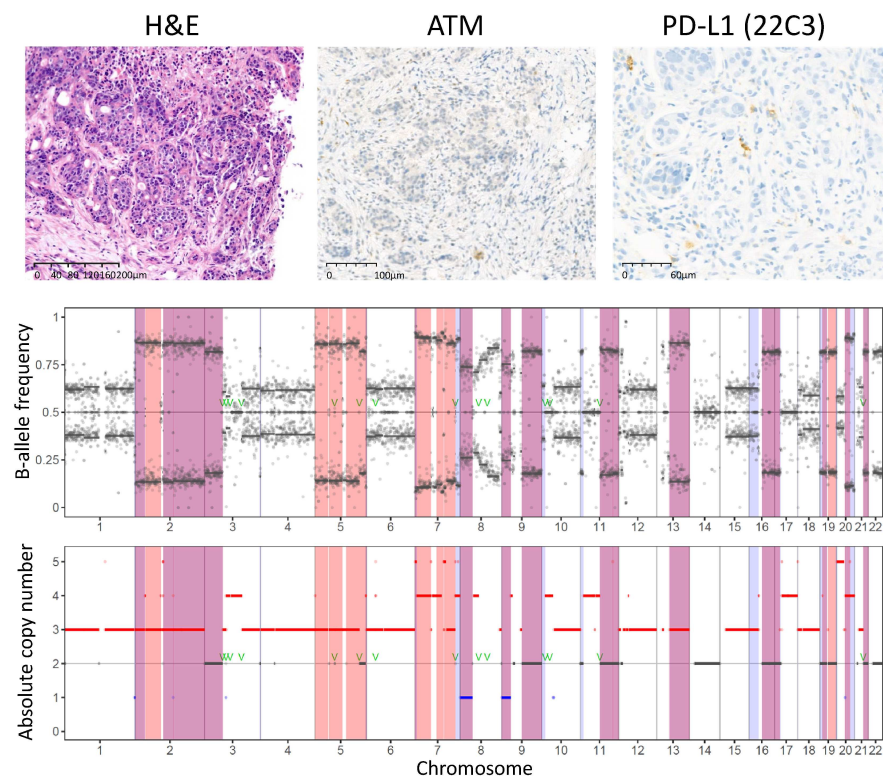**B**

Pre-treatment

On treatment  
(2 months)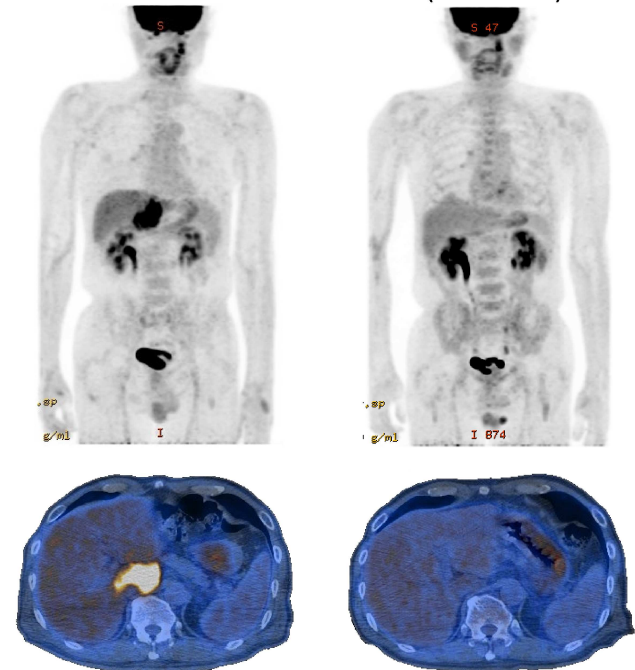**C**#2 (disease progression), ATM<sup>intact</sup>, signature HRD<sup>Lo</sup>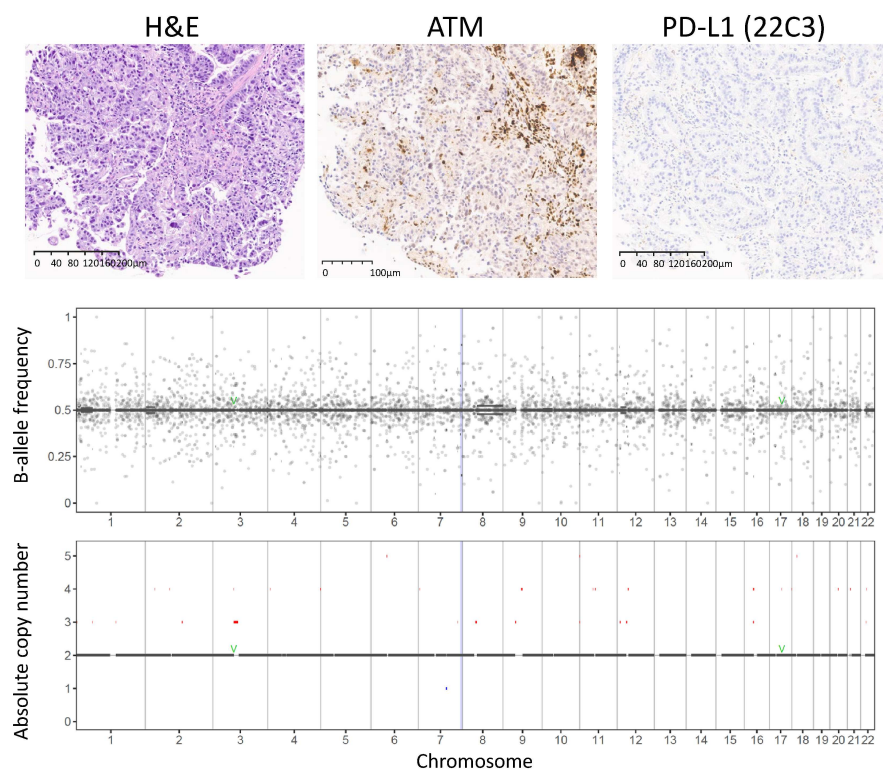**D**

Pre-treatment

On treatment  
(2 months)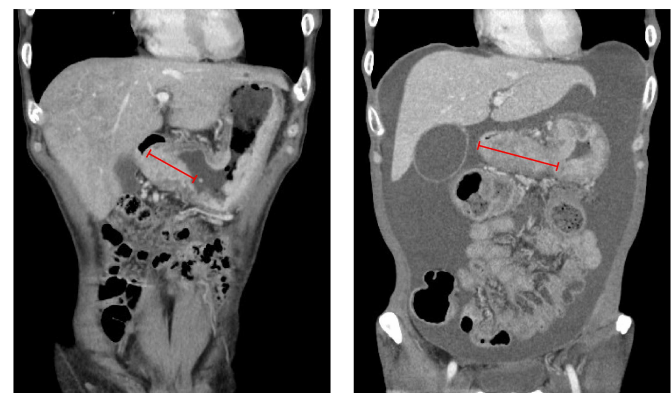

# Supplementary figure S3

**A**

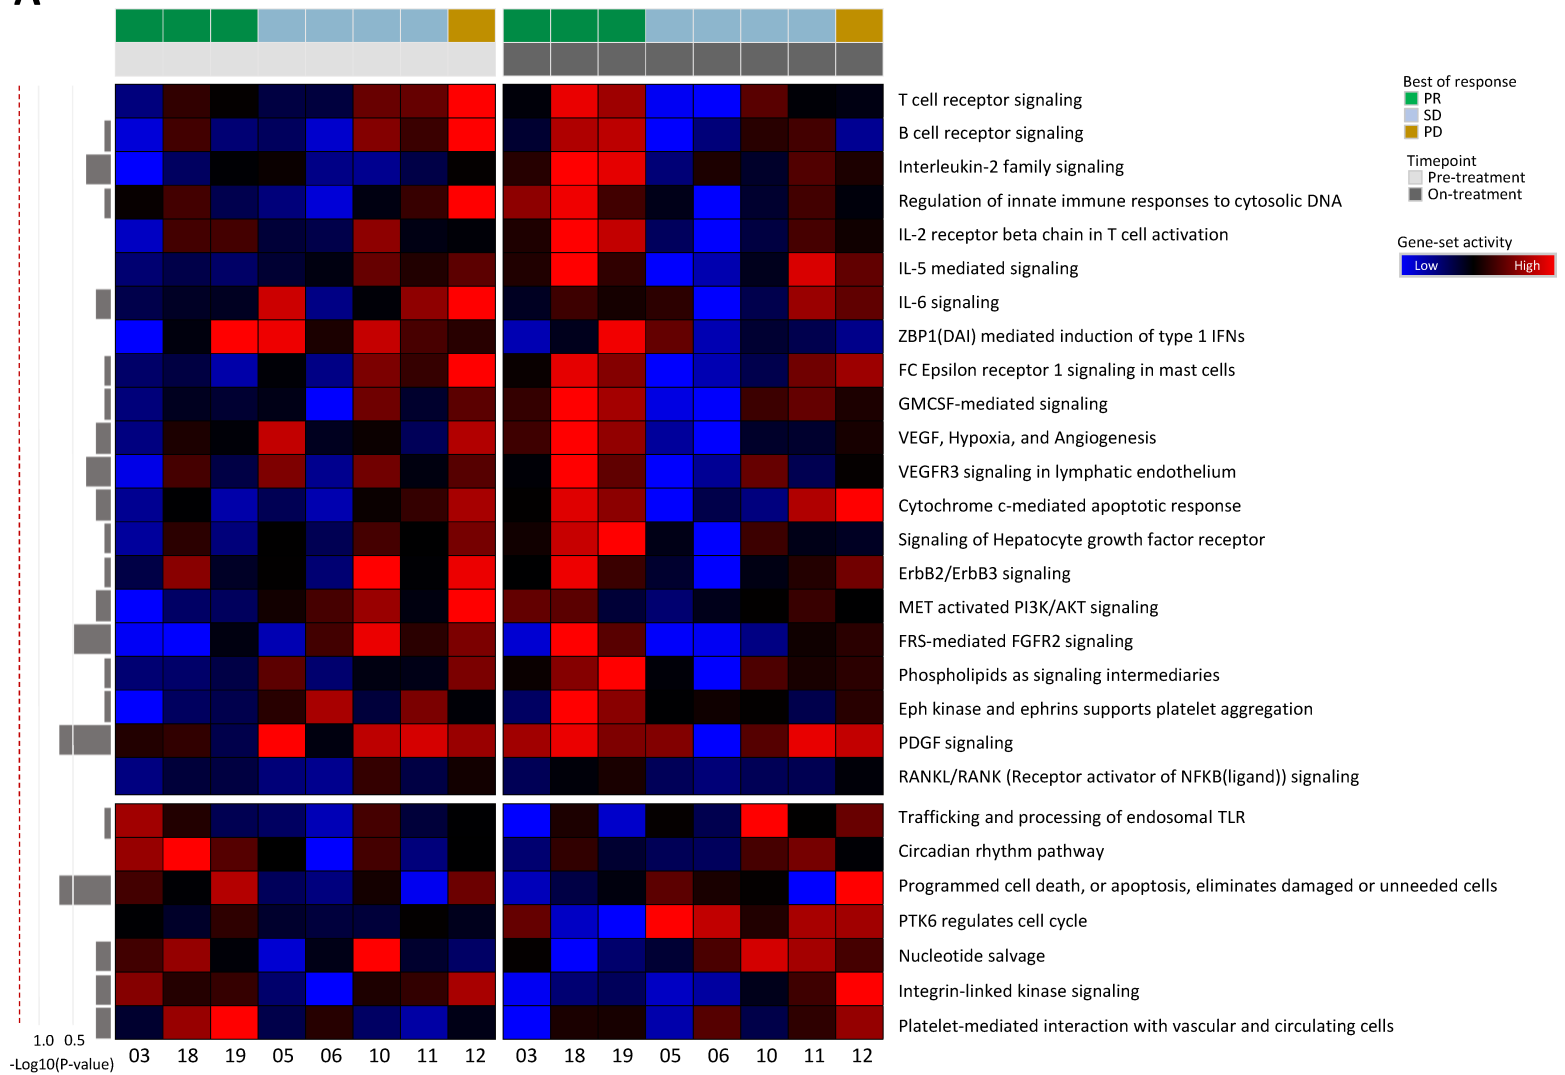

**B**

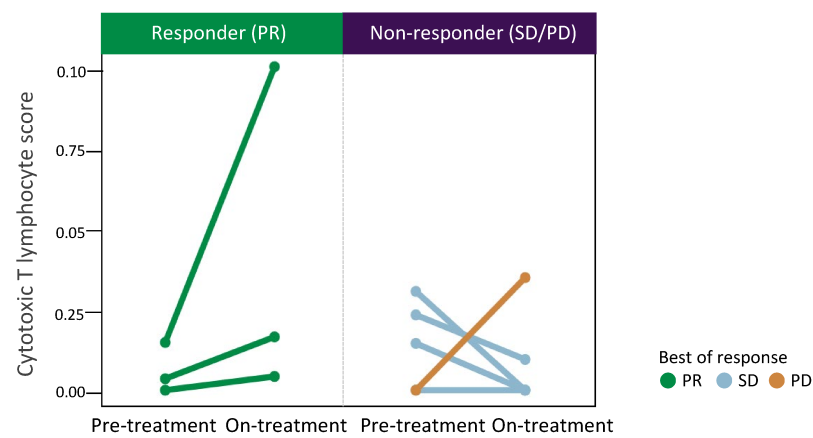

# Supplementary figure S4

## A Global cell type

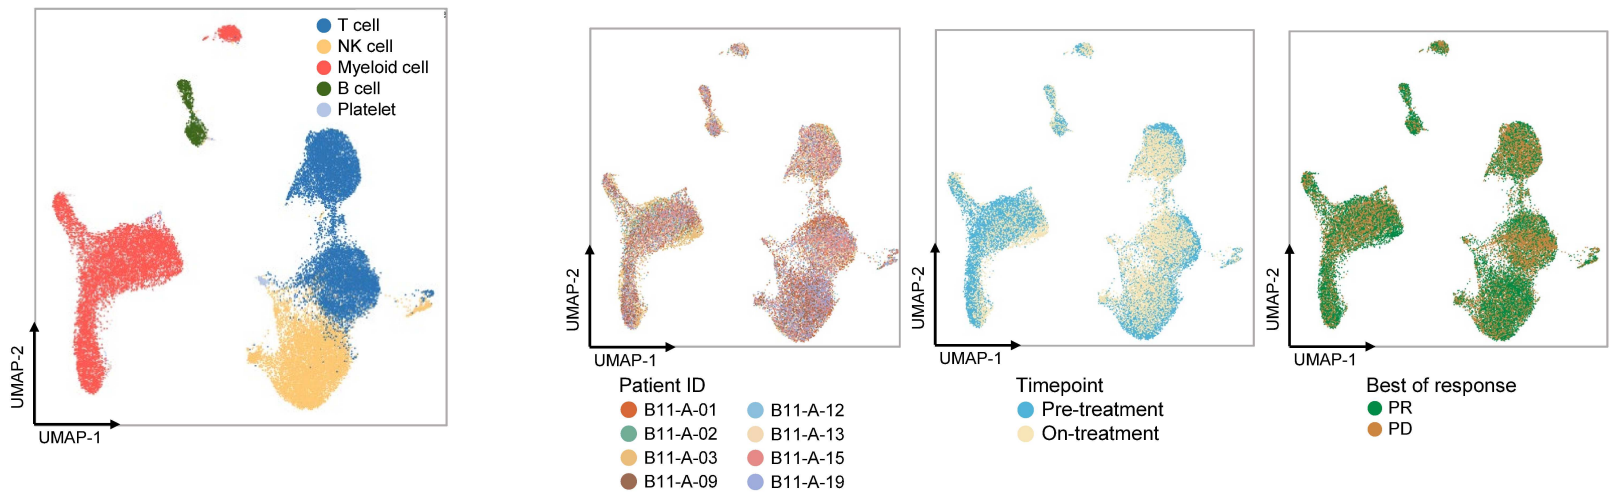

## B NK / T cell

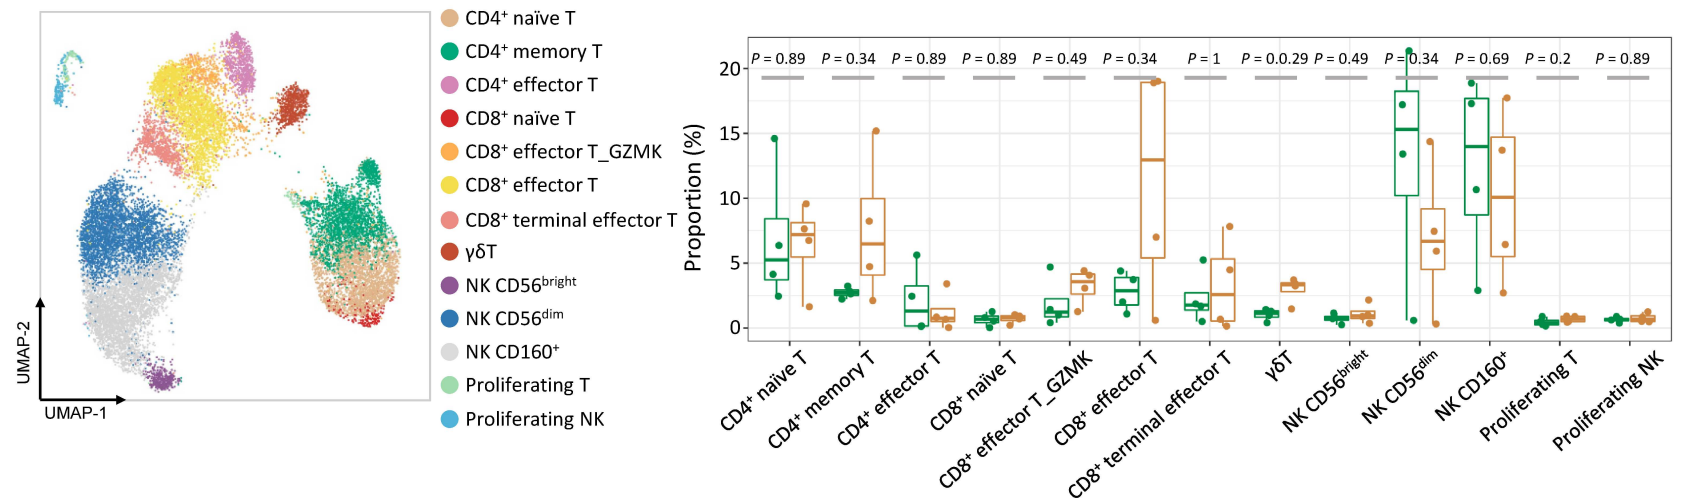

## C Myeloid cell

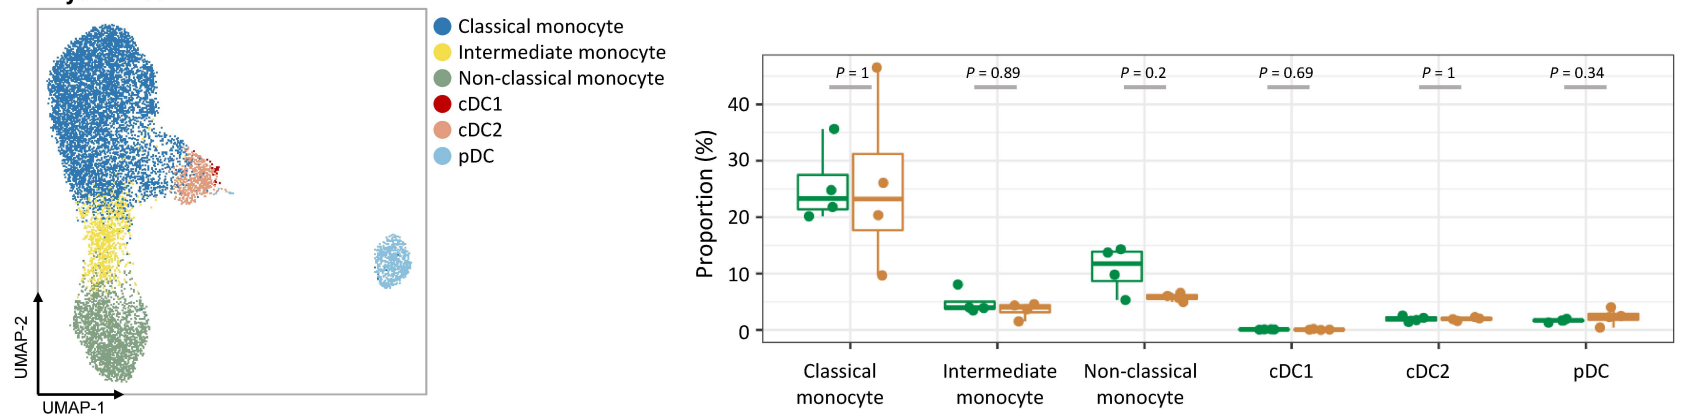

## D B cell

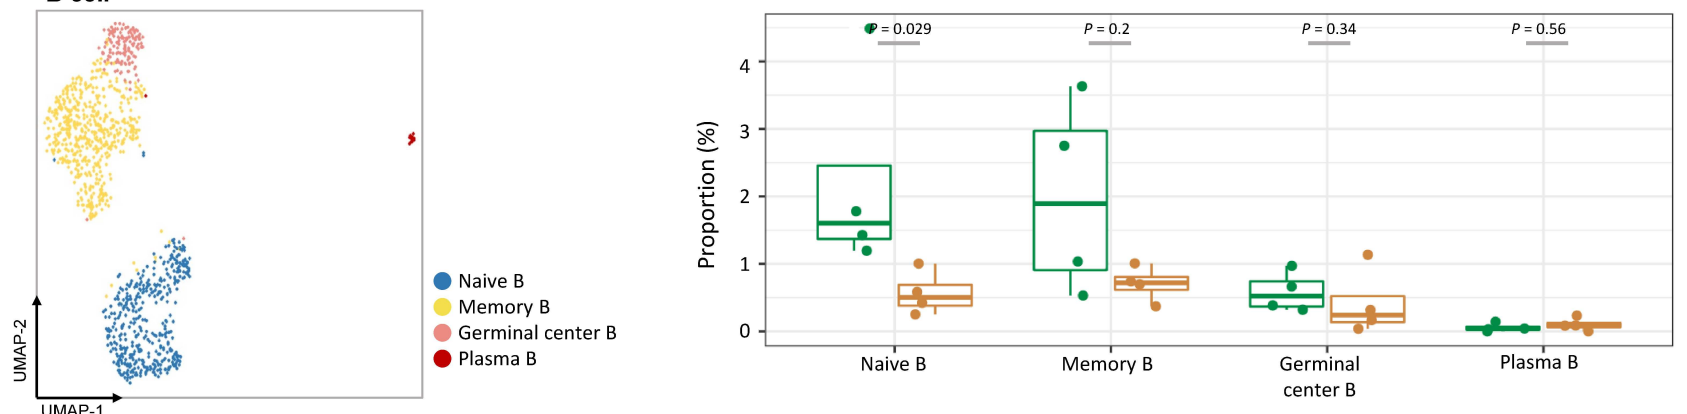

# Supplementary figure S5

**A**

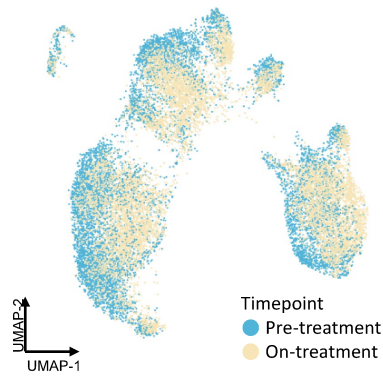

**B**

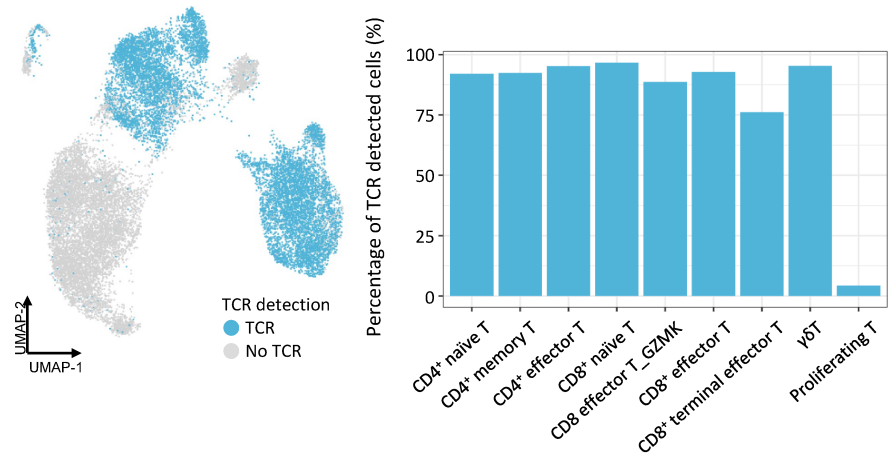

**C**

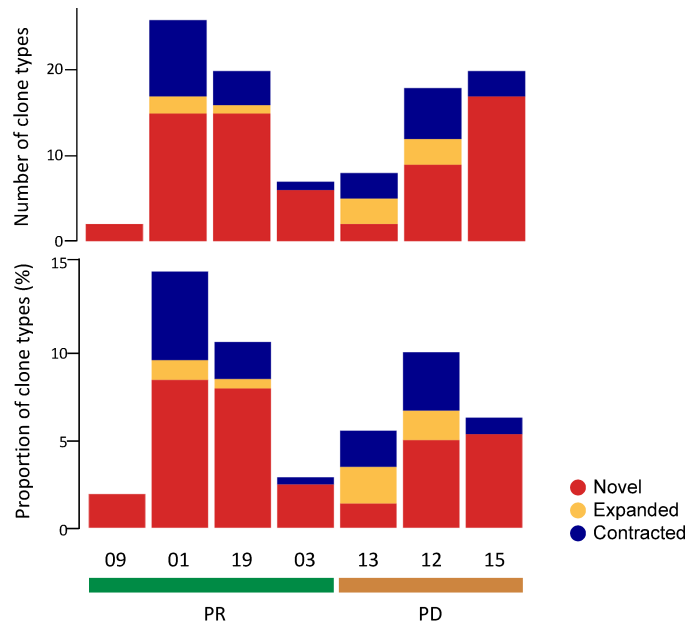

# Supplementary figure S6

## Global cell type

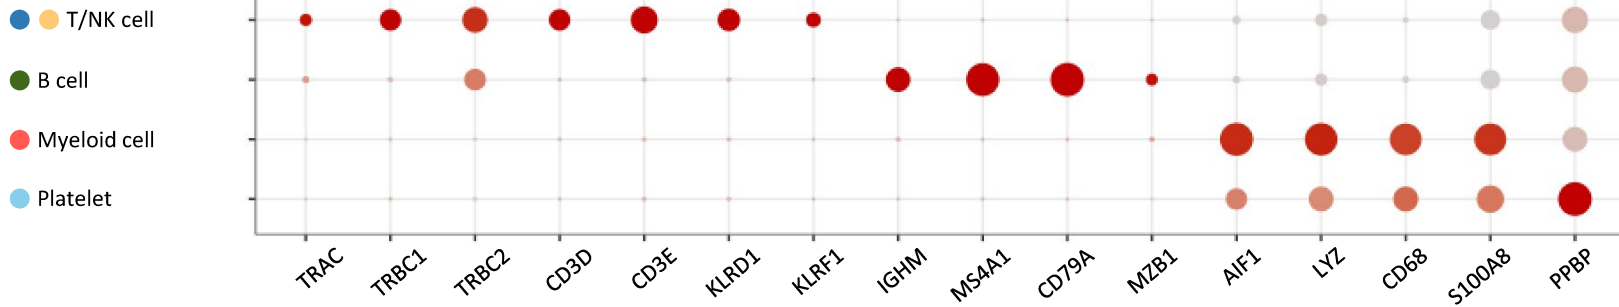

## T / NK cell

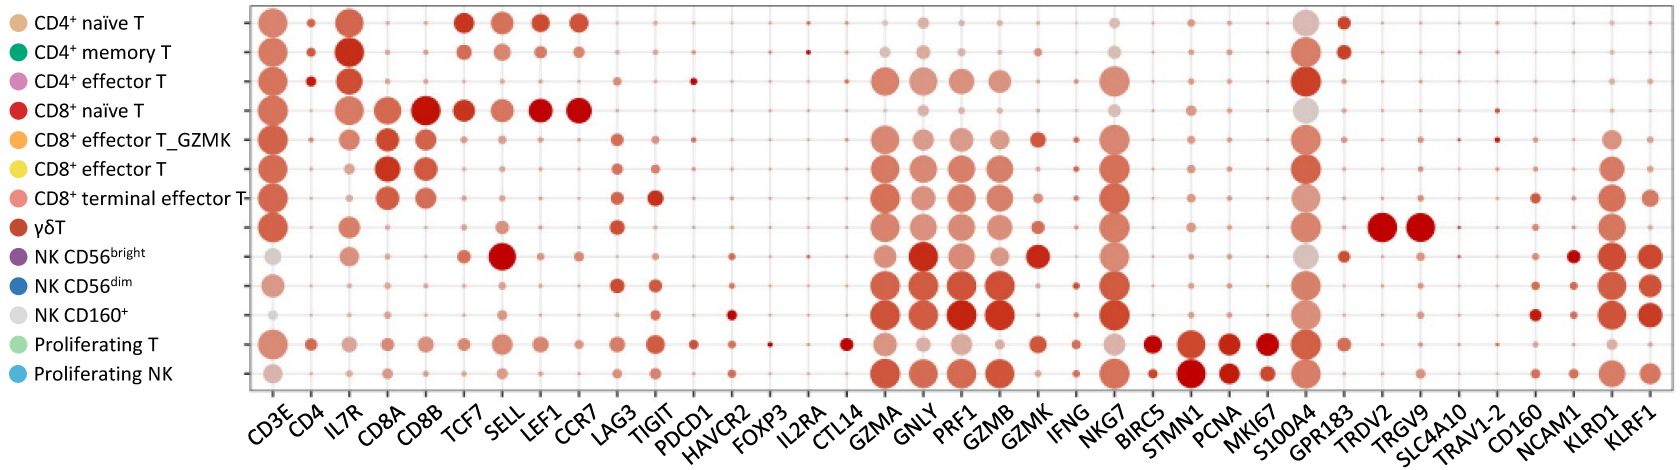

## Myeloid cell

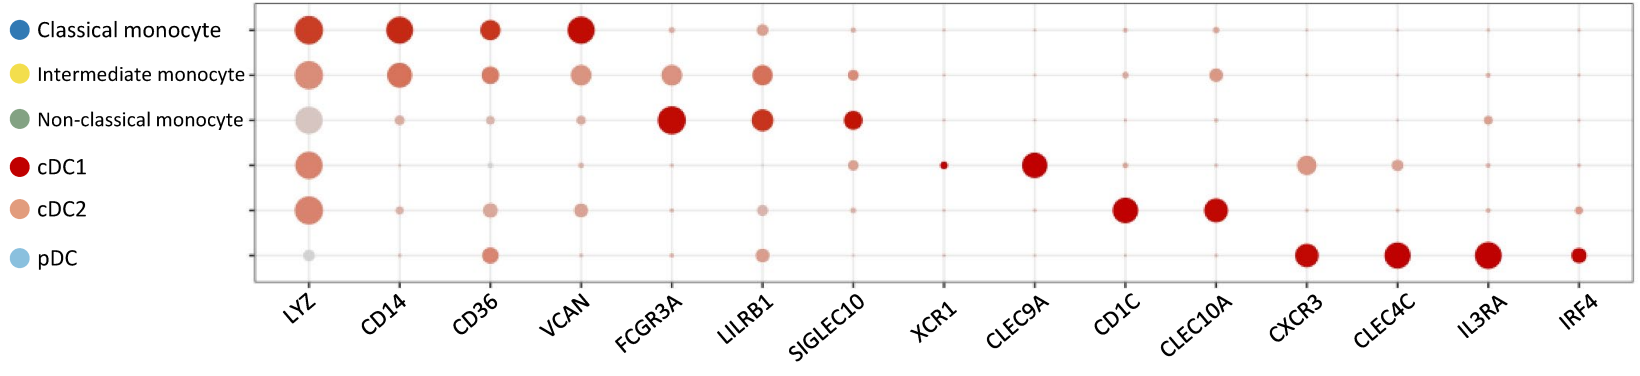

## B cell

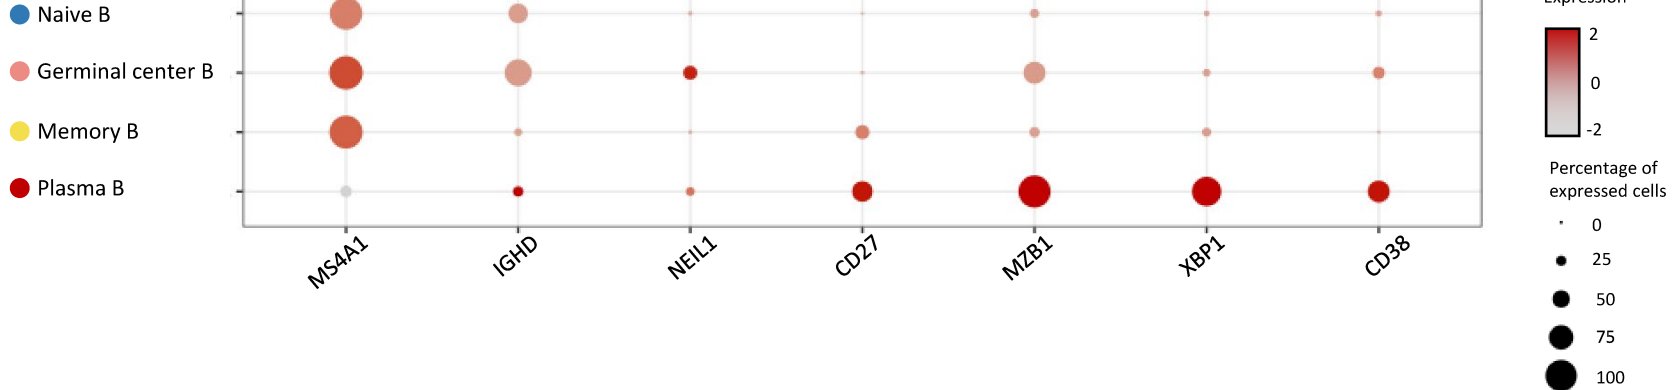

Supplement: jitc-2022-005041supp001_data_supplement.pdf [file jitc-2022-005041supp001_data_supplement.pdf]
